# Supplementary material for: Regulating spin states of single transition metal atoms on N-doped graphene for efficient ammonia synthesis
Source: Royal Society of Chemistry journal article supplement (doi:10.1039/d4ta09260k), 2025-01-01
Supplement: d4ta09260k1.pdf [file d4ta09260k1.pdf]

## Supporting Information

### Regulating Spin States of Single Transition Metal Atoms on N-Doped Graphene for Efficient Ammonia Synthesis

Wei Li, Jing Zhang, Xinxin Duan and Ding Yi\*

Department of Physics, School of Physical Science and Engineering, Beijing Jiaotong  
University, Beijing 100044, China.

\*Corresponding author: [yiding@bjtu.edu.cn](mailto:yiding@bjtu.edu.cn)

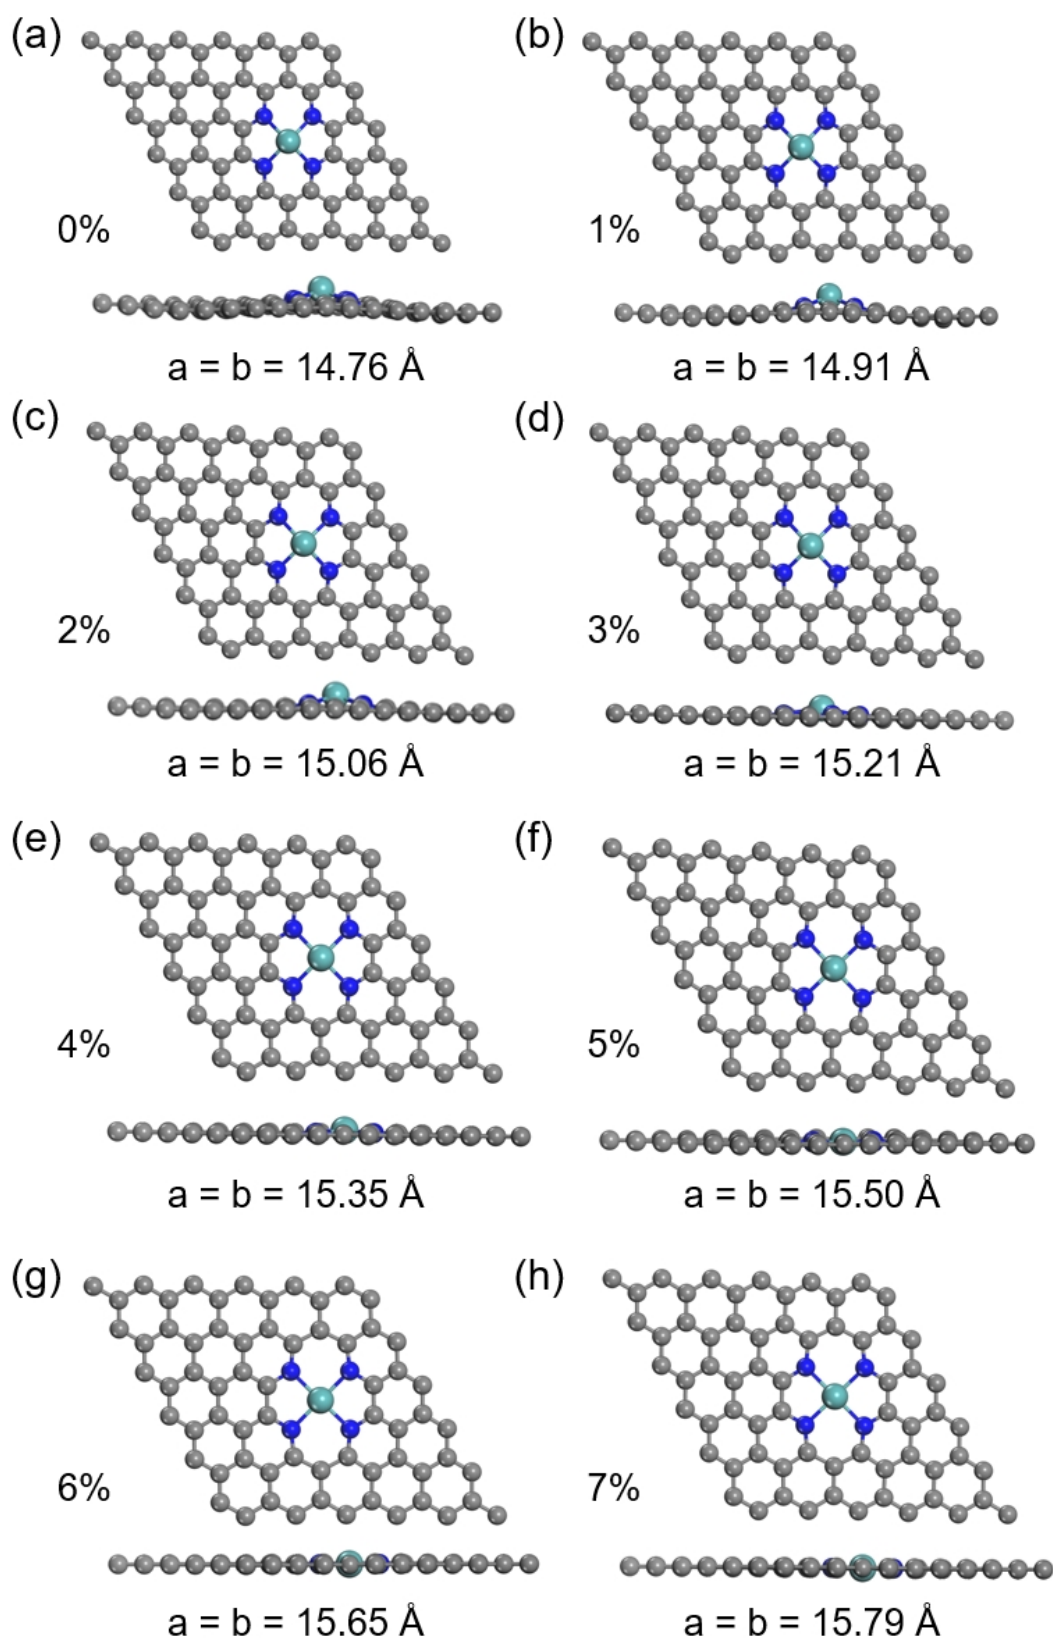

**Figure S1.** Optimized configurations of Mo-N/G with tensile strain ranging from 0% to 7%.

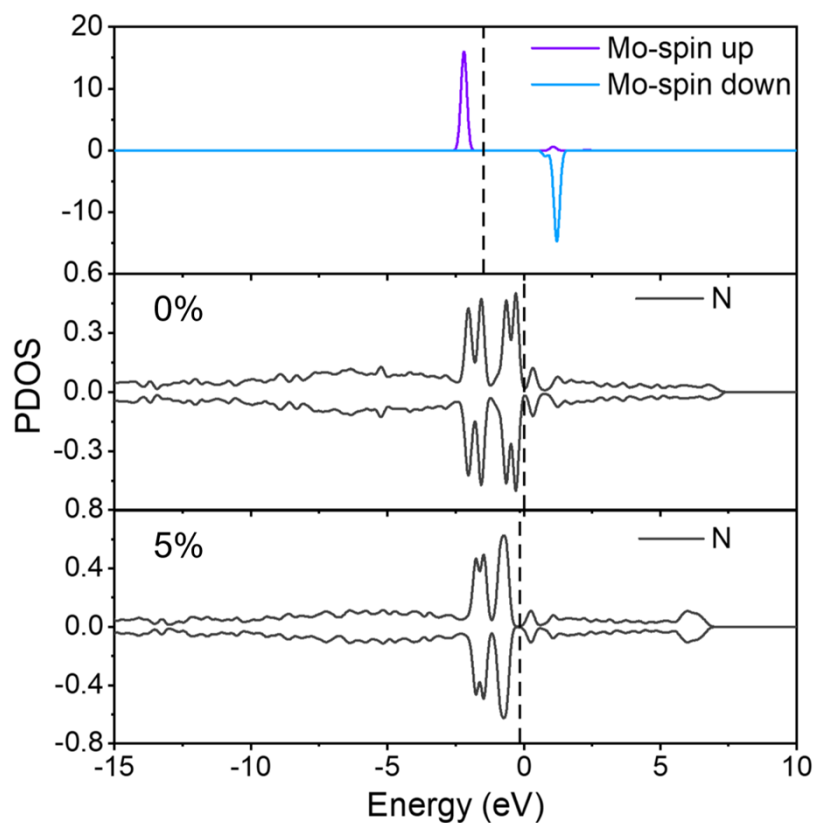

**Figure S2.** Spin-resolved PDOS of an isolated Mo atom and the N atom in N/G (without Mo) under 0% and 5% strain.

It can be clearly seen that for an isolated Mo atom, it has the largest spin splitting that all electrons occupied the spin-up states. However, for the N atom in N/G, it is spin degenerate under both 0% and 5% strain. The strong bonding of one Mo atom with four N atoms will weaken the spin splitting of the Mo atom. Therefore, weakening the Mo-N bonding by applying tensile strain (refer to ICOHP in Table S3) will make the spin state more like the isolated Mo atom (i.e. enlarged spin splitting).

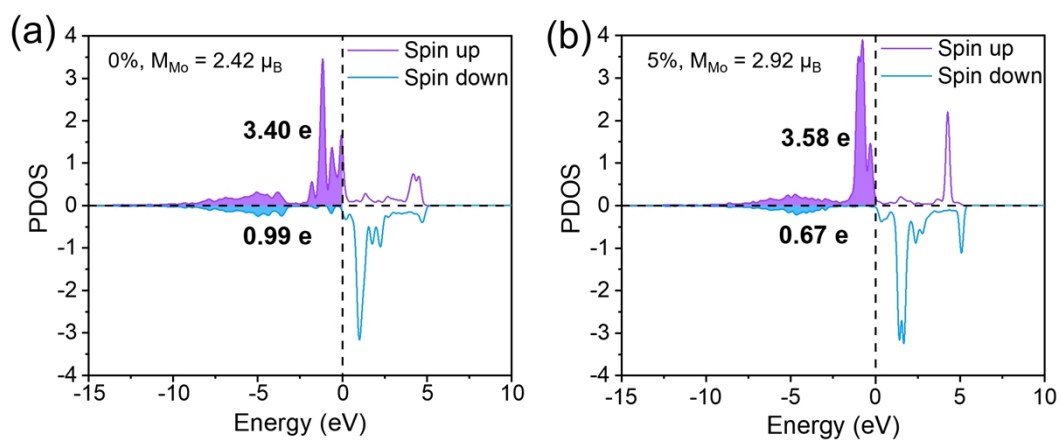

**Figure S3.** Spin-resolved PDOS and corresponding number of electrons of the Mo atom under 0% and 5% strain.

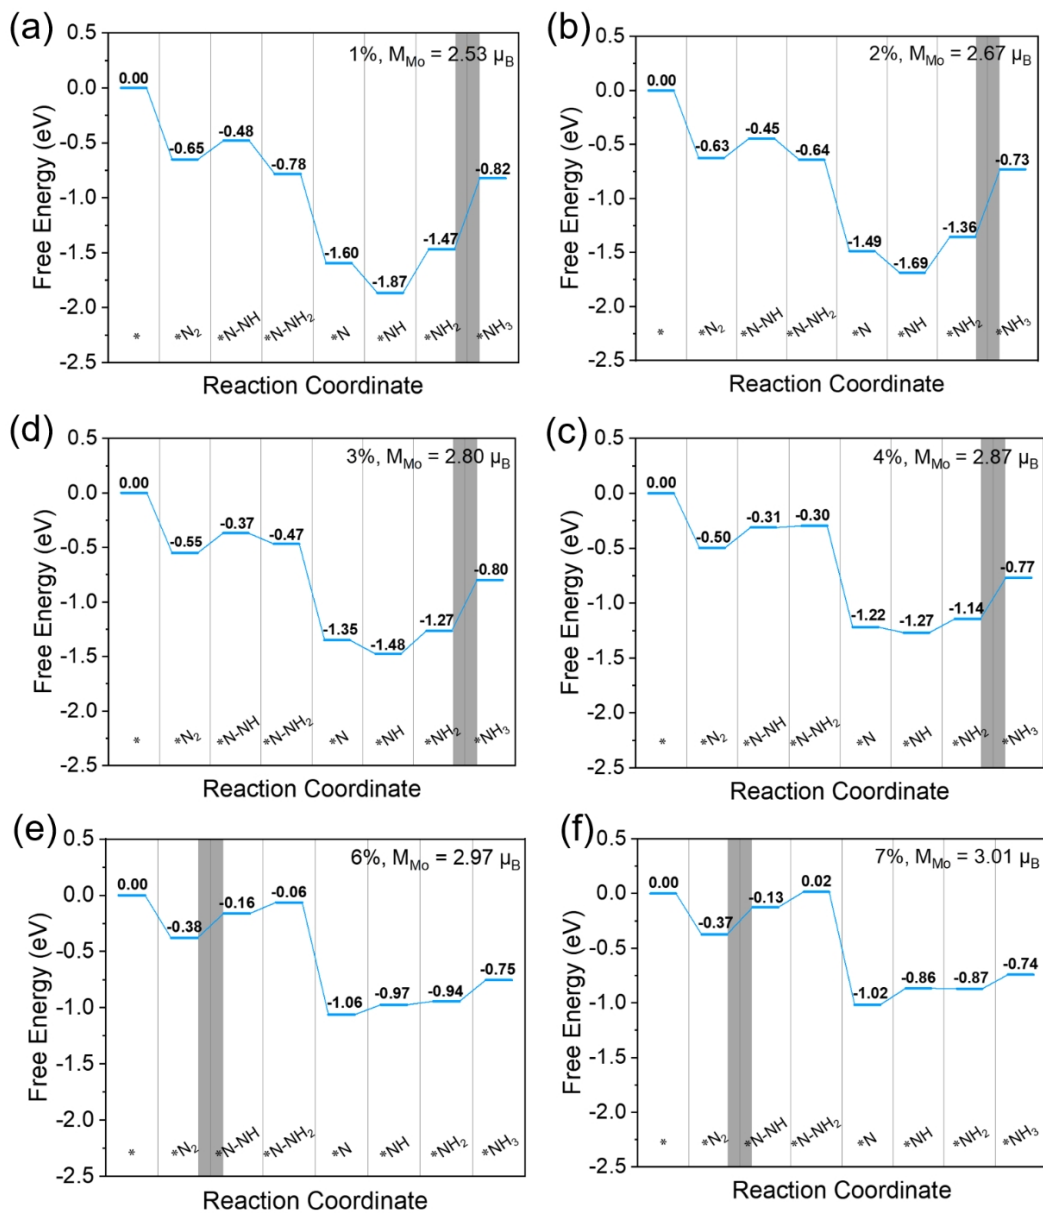

**Figure S4.** Free energy diagrams for NRR on Mo-N/G with tensile strain ranging from 1% to 7%, excluding 5% which can be found in Figure 2b in the main text.

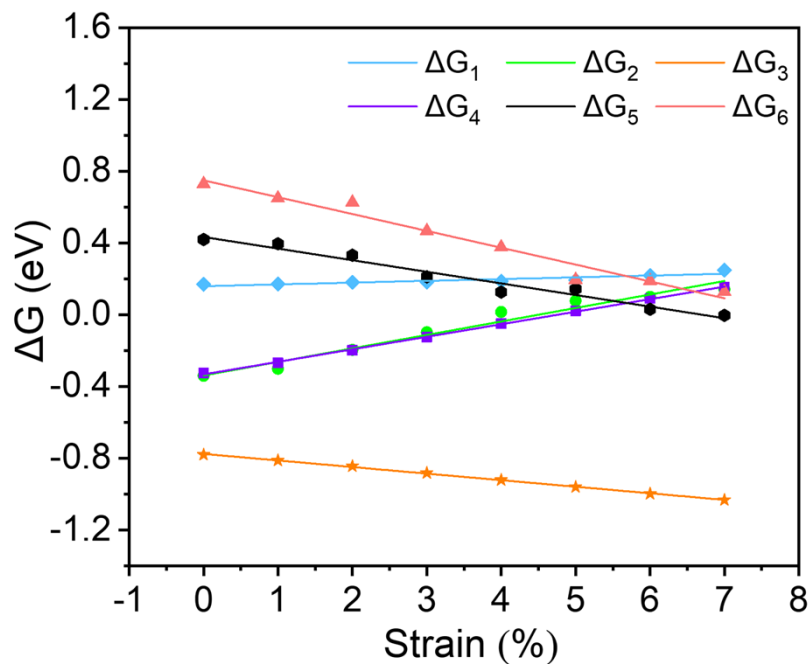

**Figure S5.** Changes of all hydrogenation steps during NRR on Mo-N/G with respect to the applied strain.

It can be clearly seen that all hydrogenation steps show good linear relationships with the applied strain, where  $\Delta G_1$  (blue),  $\Delta G_2$  (green), and  $\Delta G_4$  (violet) are all increasing, while  $\Delta G_3$  (orange),  $\Delta G_5$  (black) and  $\Delta G_6$  (red) are all decreasing. In addition,  $\Delta G_6$  and  $\Delta G_1$  correspond to PDS under 0%~5% and 6%~7% strain, respectively.

Considering the trends of  $\Delta G_1$  and  $\Delta G_6$ , as well as the stability of the system under high strain, the strain range was limited to 0%~7% when studying the strain effect of NRR on Mo-N/G.

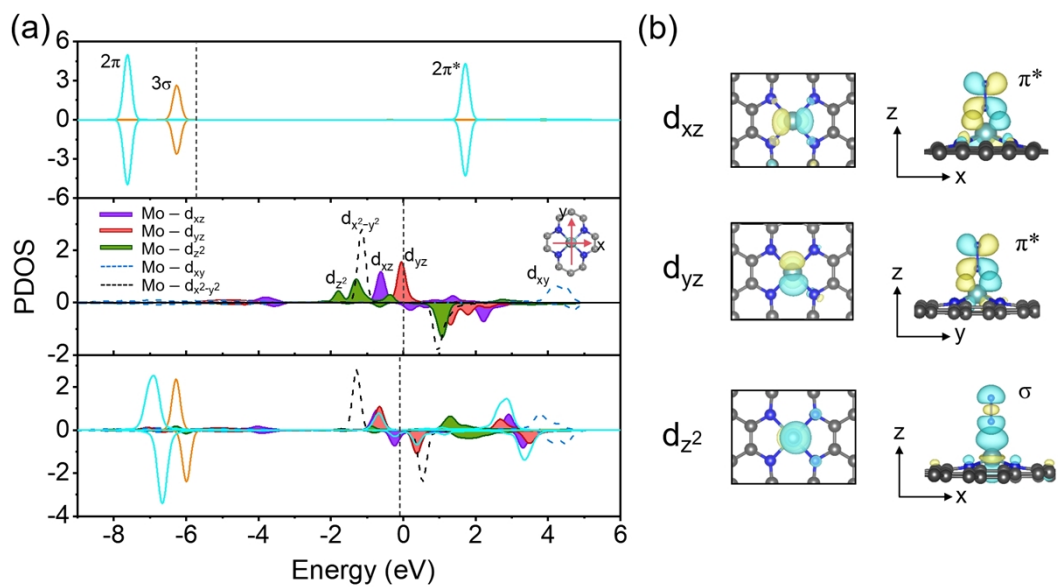

**Figure S6.** (a) PDOS of the  $N_2$  molecule and the Mo atom of the catalyst before (upper and middle panels) and after (bottom panel) Mo-N bonding. The dashed black lines represent the Fermi level ( $E_F$ ). (b) Schematic diagram of orbital matching between Mo- $d_{xz}$ / $d_{yz}$ / $d_{z^2}$  and  $N_2$ - $\pi^*$ / $\sigma$ , where cyan and yellow regions stand for different phases.

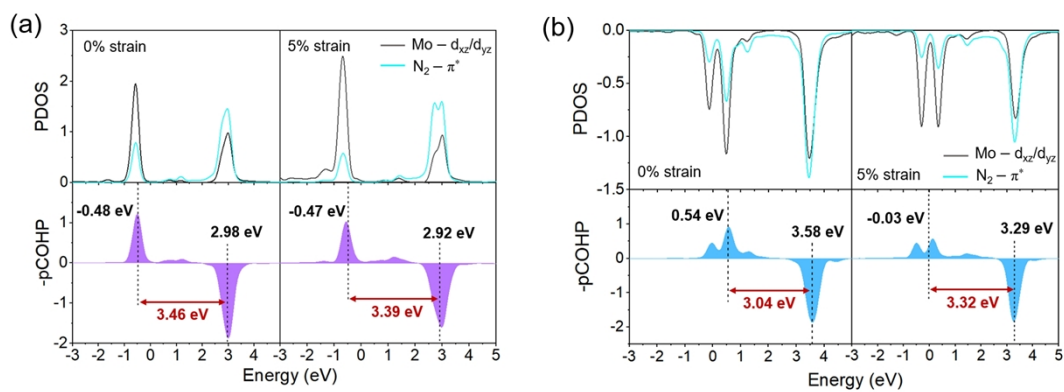

**Figure S7.** (a) Spin-up and (b) spin-down components of the PDOS and pCOHP of Mo- $d_{xz}/d_{yz}$  and  $N_2-\pi^*$  after Mo-N bonding under 0% and 5% strain.



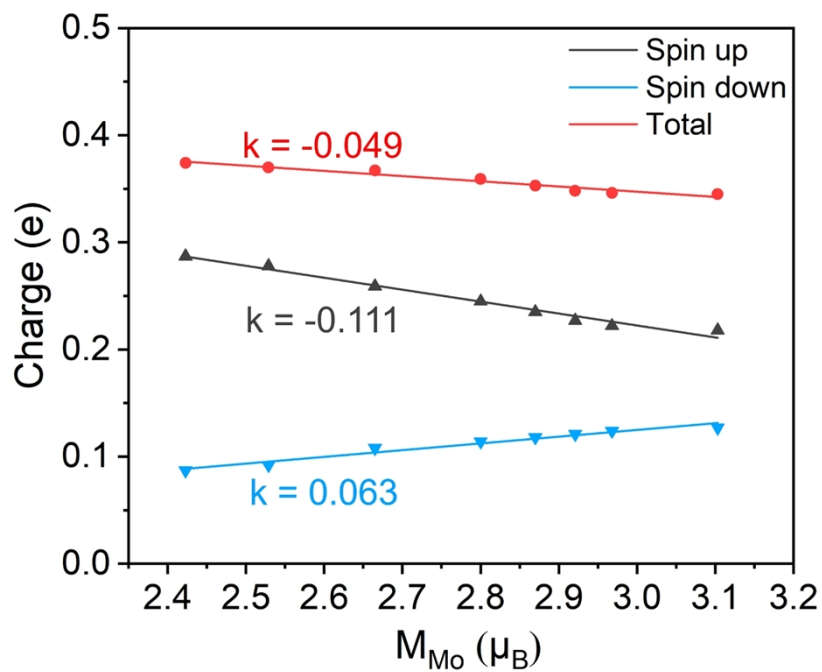

**Figure S8.** Variation of electron filling into the  $N_2-\pi^*$  orbital with respect to  $M_{Mo}$ , where  $k$  is the corresponding slope of each linear fitting line.

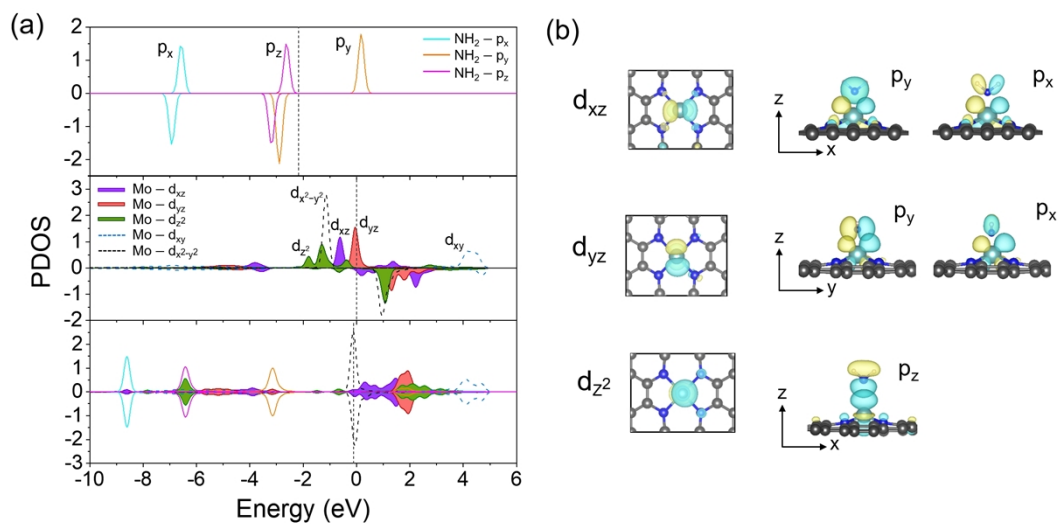

**Figure S9.** (a) PDOS of the NH<sub>2</sub> and the Mo atom of the catalyst before (upper and middle panels) and after (bottom panel) Mo-N bonding. The dashed black lines represent the Fermi level ( $E_F$ ). (b) Schematic diagram of orbital matching between Mo- $d_{xz}/d_{yz}/d_{z^2}$  and NH<sub>2</sub>- $p_x/p_y/p_z$ , where cyan and yellow regions stand for different phases.

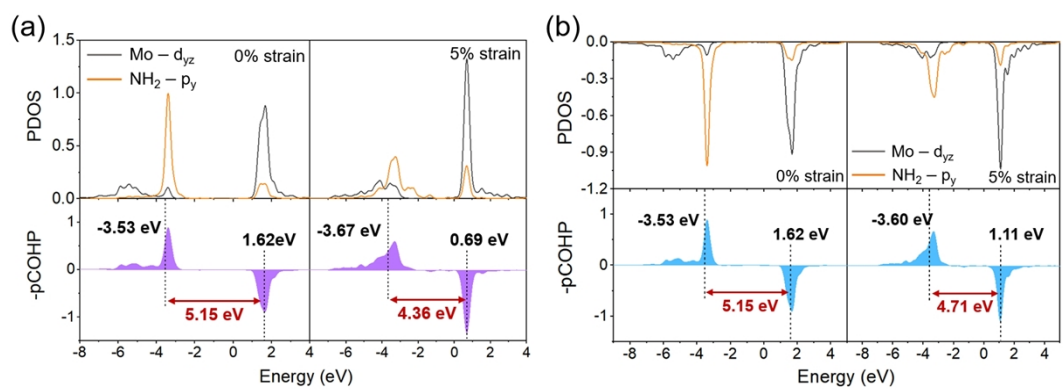

**Figure S10.** (a) Spin-up and (b) spin-down components of the PDOS and pCOHP of Mo- $d_{yz}$  and  $\text{NH}_2$ - $p_y$  after Mo-N bonding under 0% and 5% strain.

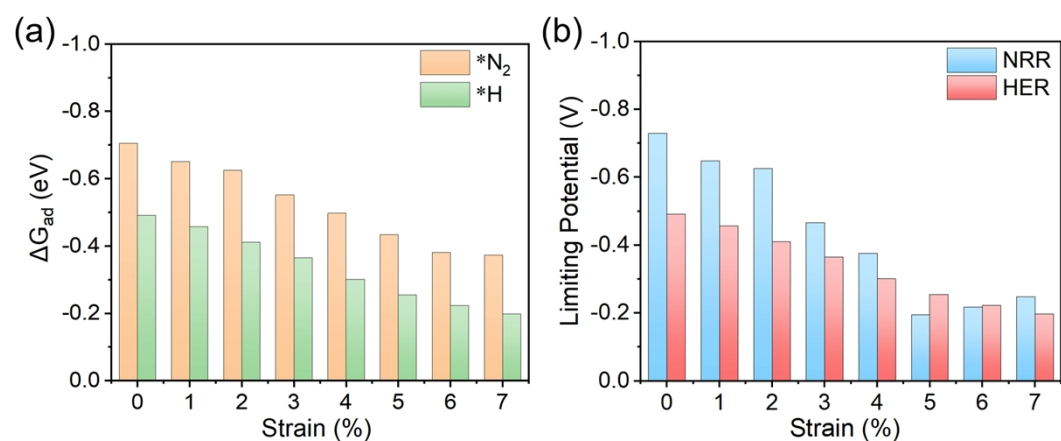

**Figure S11.** (a) Adsorption free energy of  $N_2$  and H with respect to the applied strain.  
 (b) Limiting potential of NRR and HER with respect to the applied strain.

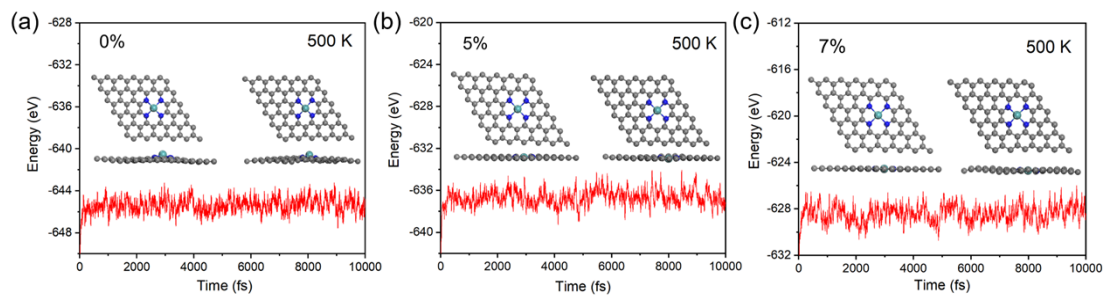

**Figure S12.** Evolution of total energy of Mo-N/G under strains of (a) 0% (pristine), (b) 5% (best performance) and (c) 7% (largest value in this work) in AIMD simulations at 500 K. Insets: the initial (0 ps) and final (10 ps) structures of Mo-N/G.

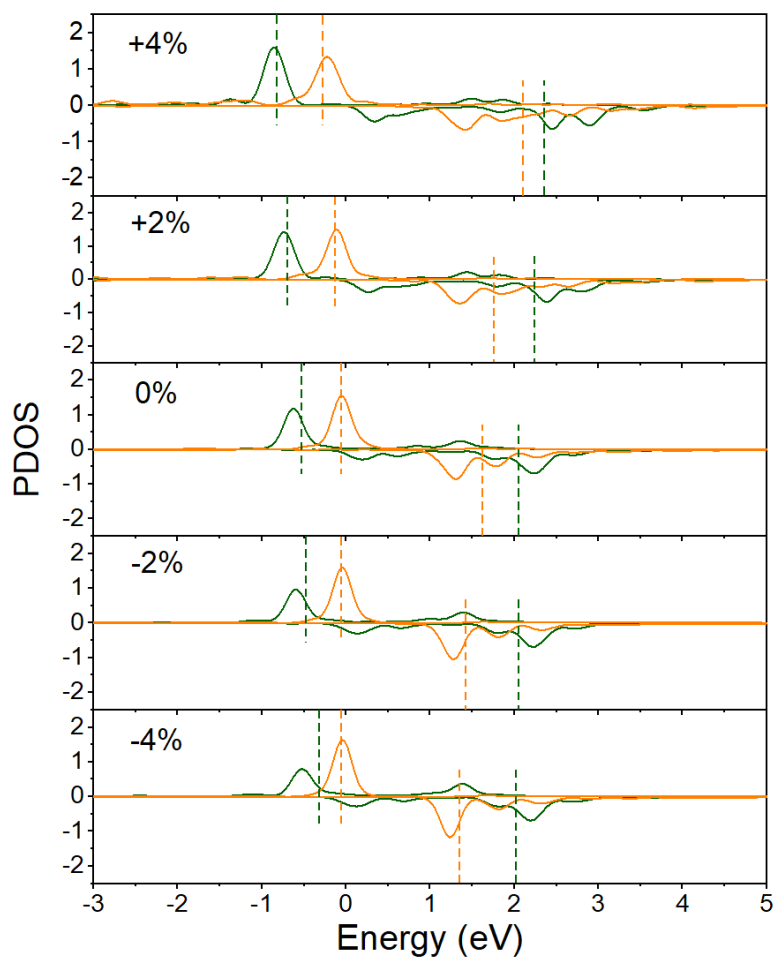

**Figure S13.** PDOS of Mo- $d_{xz}$  and  $d_{yz}$  orbitals under different strains. The dashed lines are the centers of the corresponding orbitals for quantification of the spin splitting.

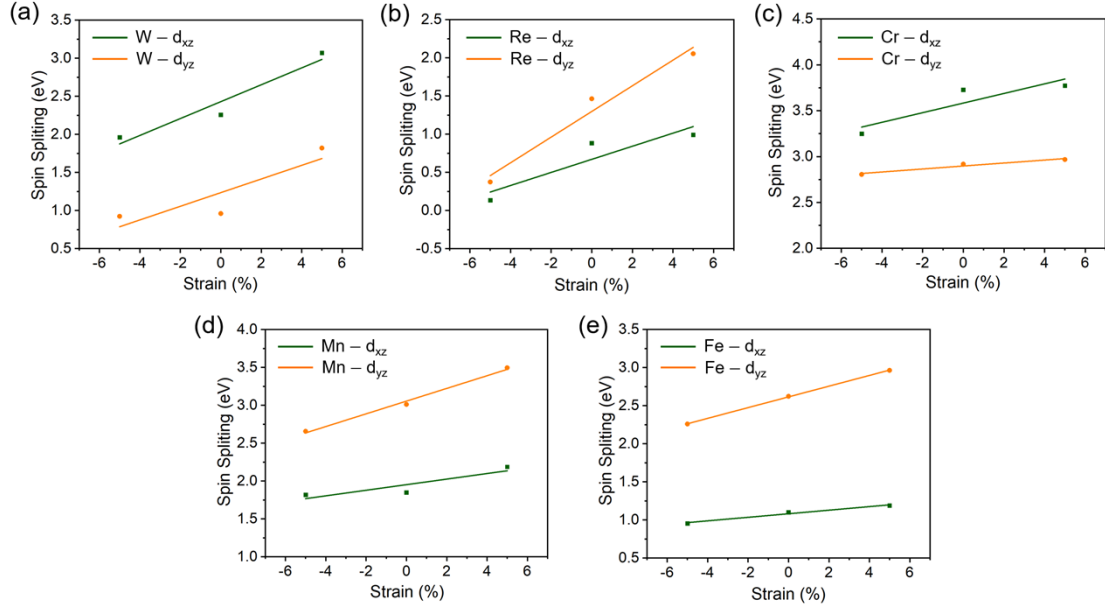

**Figure S14.** Spin splitting of  $d_{xz}$  and  $d_{yz}$  orbitals of (a) W, (b) Re, (c) Cr, (d) Mn, and (e) Fe with respect to the applied strain from  $-5\%$  to  $5\%$ . The values of spin splitting of  $d_{xz}$  and  $d_{yz}$  orbitals were obtained from Figure S15.

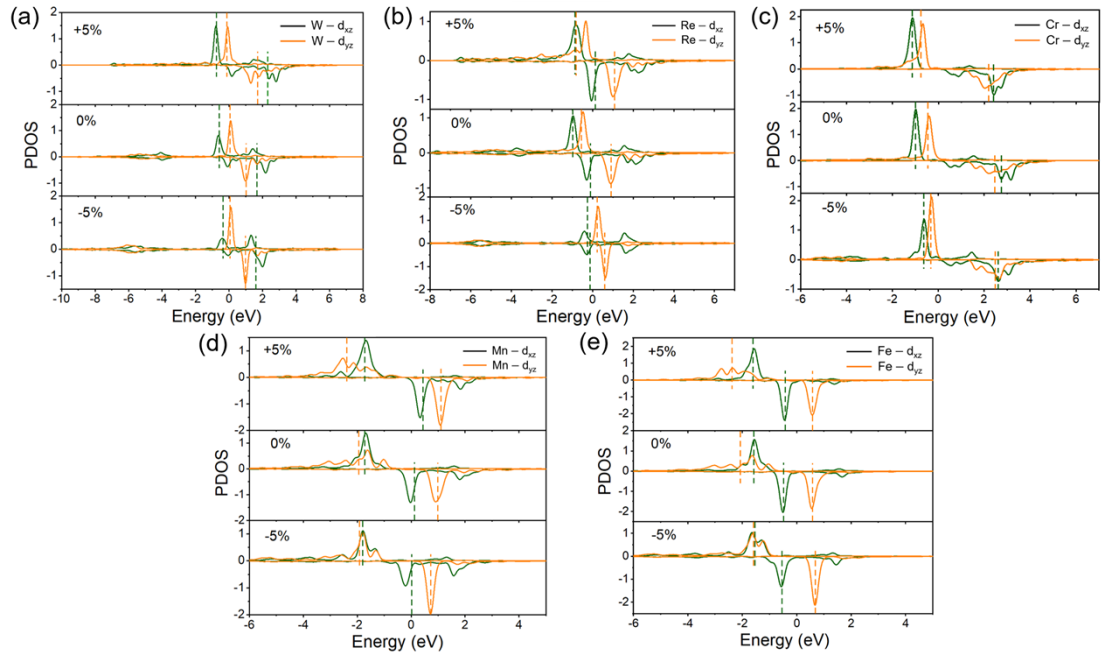

**Figure S15.** PDOS of  $d_{xz}$  and  $d_{yz}$  orbitals under different strains. The dashed lines are the centers of the corresponding orbitals for quantification of the spin splitting.



**Table S1.** Calculated  $E_{\text{ZPE}}$  and TS of gas molecules under 298 K and 1 bar.

| Species                 | $E_{\text{ZPE}}$ (eV) | TS (eV) |
|-------------------------|-----------------------|---------|
| $\text{N}_2(\text{g})$  | 0.15                  | 0.59    |
| $\text{H}_2(\text{g})$  | 0.27                  | 0.40    |
| $\text{NH}_3(\text{g})$ | 0.91                  | 0.61    |

**Table S2.** Calculated  $E_{\text{ZPE}}$  and TS of intermediates on catalyst under 298 K.

| Species            | $E_{\text{ZPE}}$ (eV) | TS (eV) | Species          | $E_{\text{ZPE}}$ (eV) | TS (eV) |
|--------------------|-----------------------|---------|------------------|-----------------------|---------|
| *N <sub>2</sub>    | 0.21                  | 0.12    | *NH              | 0.37                  | 0.06    |
| *N-NH              | 0.50                  | 0.14    | *NH <sub>2</sub> | 0.67                  | 0.08    |
| *N-NH <sub>2</sub> | 0.84                  | 0.14    | *NH <sub>3</sub> | 1.06                  | 0.10    |
| *N                 | 0.09                  | 0.05    | *H               | 0.15                  | 0.04    |

**Table S3.** Mo-N bond length and ICOHP<sup>(#)</sup> in Mo-N/G with tensile strain ranging from 0% to 7%.

| Strain (%)            | 0     | 1     | 2     | 3     | 4     | 5     | 6     | 7     |
|-----------------------|-------|-------|-------|-------|-------|-------|-------|-------|
| d <sub>Mo-N</sub> (Å) | 2.040 | 2.048 | 2.057 | 2.072 | 2.097 | 2.126 | 2.155 | 2.186 |
| ICOHP                 | -1.63 | -1.58 | -1.53 | -1.48 | -1.41 | -1.35 | -1.29 | -1.22 |

<sup>(#)</sup> ICOHP (integrated crystal orbital Hamilton population). The absolute value of ICOHP can quantify the bonding strength, where larger absolute values correspond to larger bonding strength.

**Table S4.** N<sub>2</sub> adsorption energy<sup>(#)</sup> and bond length on Mo-N/G under different strains (or M<sub>Mo</sub>).

| Strain (%)           | 0     | 1     | 2     | 3     | 4     | 5     | 6     | 7     |
|----------------------|-------|-------|-------|-------|-------|-------|-------|-------|
| M <sub>Mo</sub> (μB) | 2.42  | 2.53  | 2.67  | 2.80  | 2.87  | 2.92  | 2.97  | 3.01  |
| E <sub>ad</sub> (eV) | -1.28 | -1.18 | -1.16 | -1.08 | -1.03 | -0.97 | -0.91 | -0.90 |
| d <sub>N-N</sub> (Å) | 1.157 | 1.156 | 1.153 | 1.151 | 1.150 | 1.149 | 1.148 | 1.147 |

<sup>(#)</sup> The adsorption energy of N<sub>2</sub> on Mo-N/G is defined as:

$$E_{ad} = E_{N_2 - Mo - N/G} - E_{Mo - N/G} - E_{N_2},$$

where  $E_{N_2 - Mo - N/G}$  is the energy of Mo-N/G with adsorbed N<sub>2</sub>,  $E_{Mo - N/G}$  is the energy of Mo-N/G, and  $E_{N_2}$  is the energy of free N<sub>2</sub>.

**Table S5.** Binding energy<sup>(#)</sup> between Mo and N/G under different strains.

| Strain (%)          | 0     | 1     | 2     | 3     | 4     | 5     | 6     | 7     |
|---------------------|-------|-------|-------|-------|-------|-------|-------|-------|
| E <sub>b</sub> (eV) | -7.27 | -7.33 | -7.42 | -7.56 | -7.68 | -7.76 | -7.79 | -7.86 |

<sup>(#)</sup> The binding energy is defined as:

$$E_b = E_{Mo-N/G} - E_{N/G} - E_{Mo},$$

where  $E_{Mo-N/G}$  is the energy of Mo-N/G,  $E_{N/G}$  is the energy of N/G without the Mo atom, and  $E_{Mo}$  is the energy of an isolated Mo atom.

**Table S6.** Magnetic moments of TM (TM = Re, Mo, W, Cr, Mn, Fe) in TM-N/G under −5%, 0% and 5% strain, respectively.

|    | −5%  | 0%   | 5%   |
|----|------|------|------|
| Re | 0.36 | 2.39 | 2.61 |
| Mo | 2.17 | 2.42 | 2.92 |
| W  | 1.21 | 2.01 | 2.73 |
| Cr | 3.18 | 3.34 | 3.52 |
| Mn | 2.92 | 3.06 | 3.22 |
| Fe | 1.80 | 1.91 | 2.01 |
